# Supplementary material for: The Influence of High-Intensity Ultrasonication on Properties of Cellulose Produced from the Hop Stems, the Byproduct of the Hop Cones Production
Source: MDPI journal article supplement (doi:10.3390/molecules27092624), 2022-04-19
Supplement: s1 [file s1]

Supplementary material

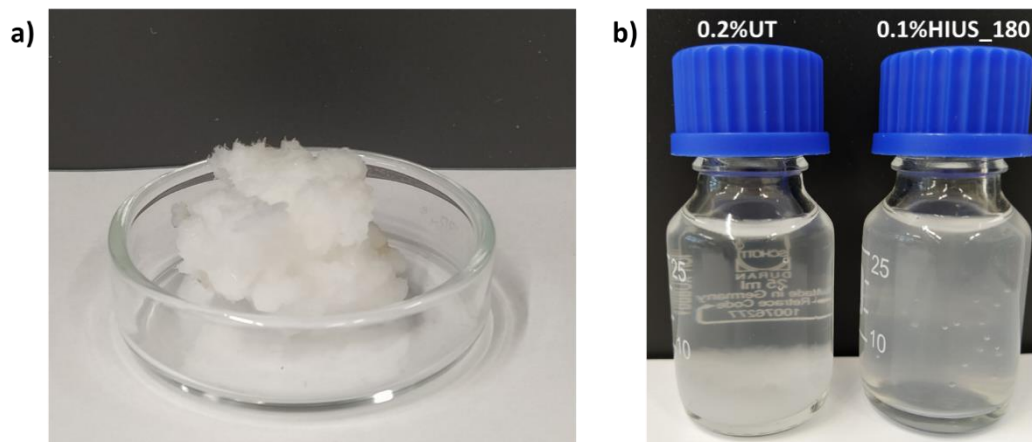

**Figure S1.** Photos of cellulose isolated from hop stems (a) and dispersions of cellulose after mechanical disintegration (0.2%UT) and 180 min of HIUS treatment (0.1%HIUS\_180) (b).

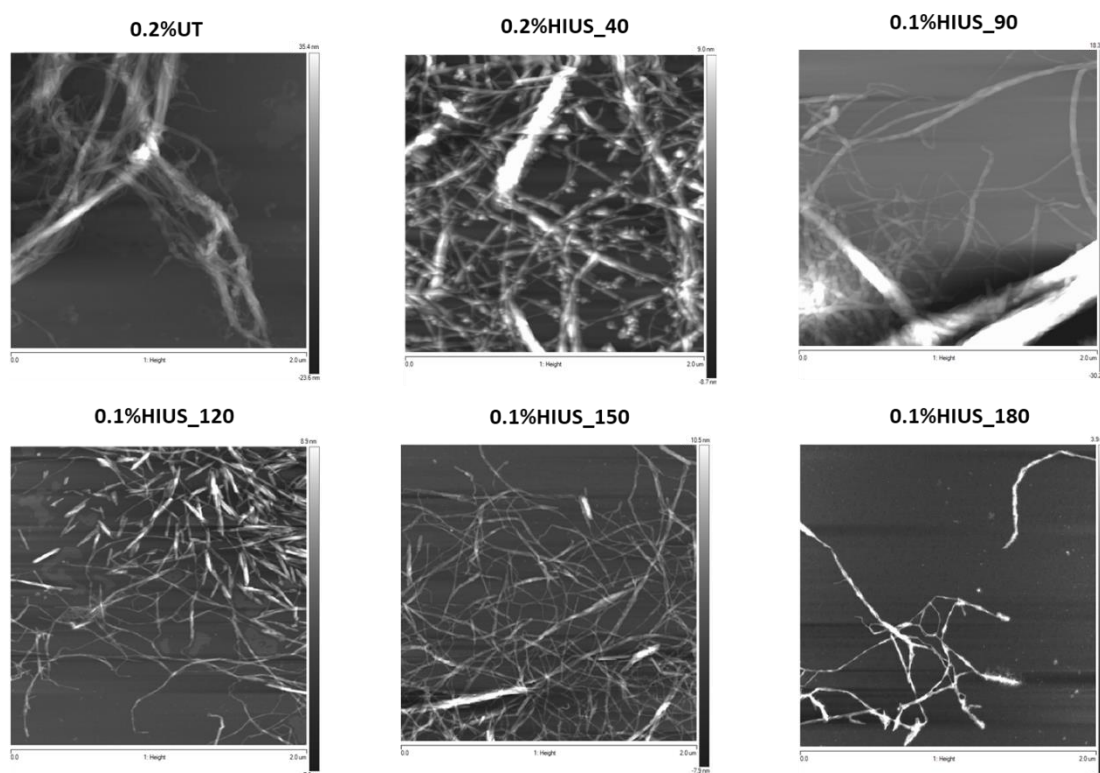

**Figure S2.** Representative atomic force microscope (AFM) height images of cellulose isolated from hop stems after different duration of HIUS treatment. The image dimension is 2 μm x 2 μm.

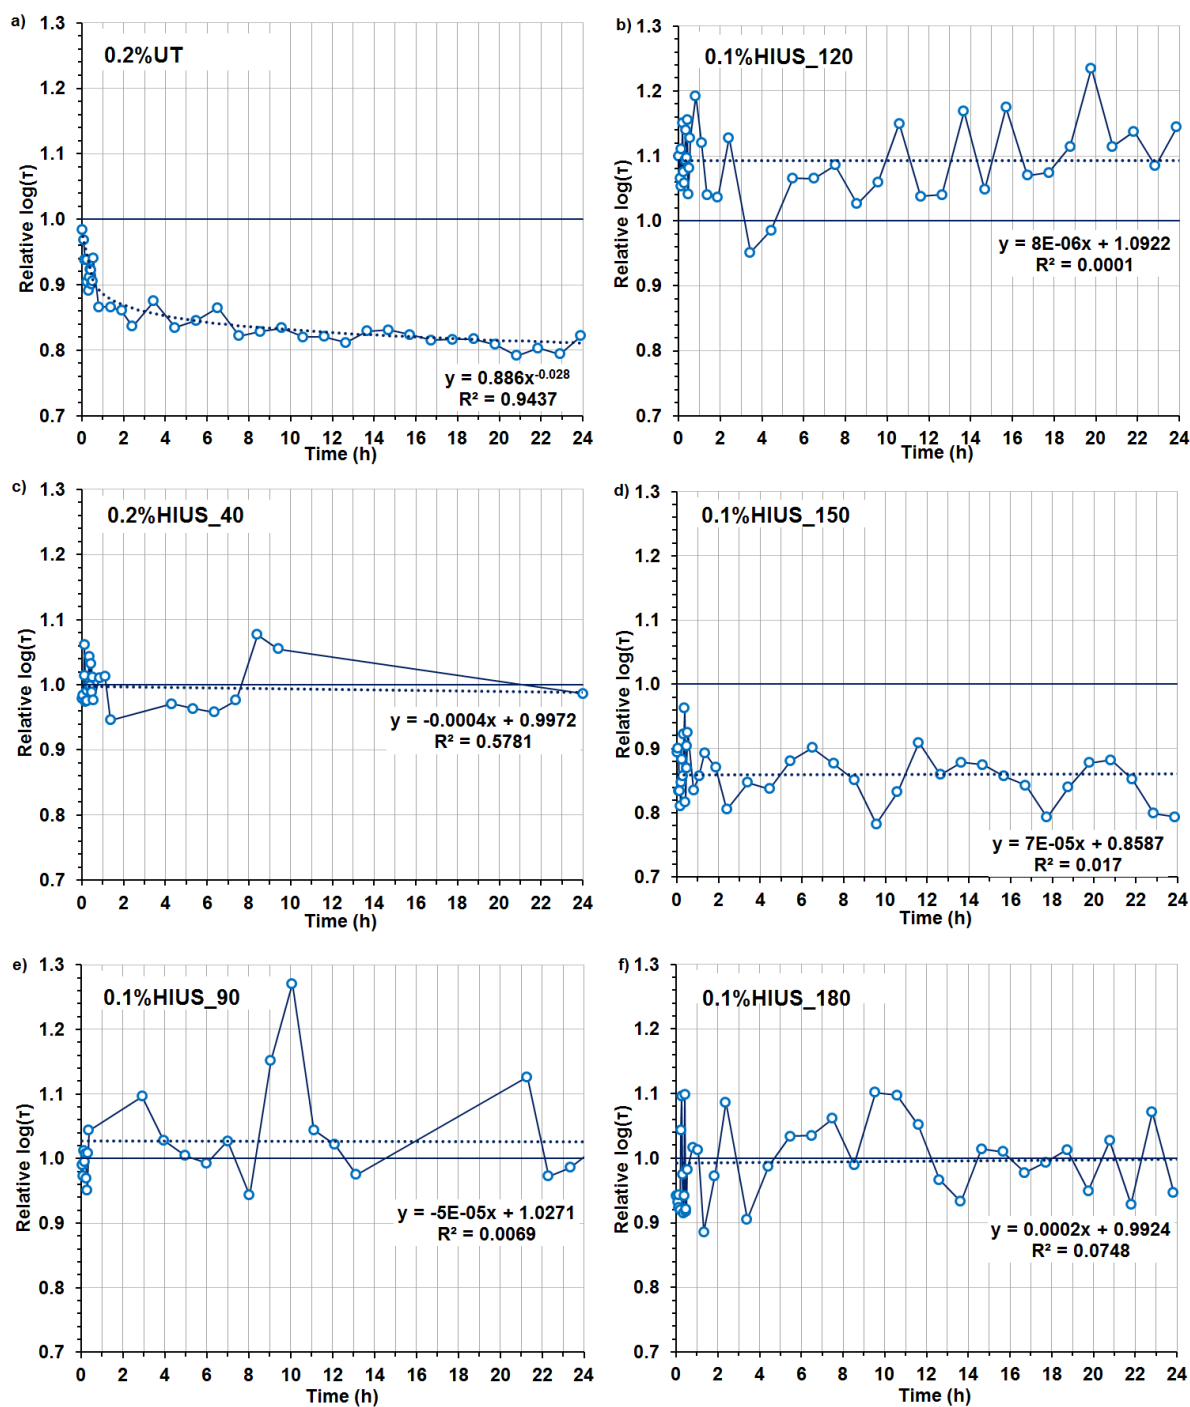

**Figure S3.** The values of relative  $\log(\tau)$  obtained for particular sample (a-f) during the first 24 hours of experiment; solid line marks relative  $\log(\tau)$  equal to 1; dotted line shows the fitted trend line.
